# Supplementary material for: Melilite glass–ceramic sealants for solid oxide fuel cells: effects of ZrO2 additions assessed by microscopy, diffraction and solid-state NMR
Source: Royal Society of Chemistry journal article supplement (doi:10.1039/c3ta10789b), 2013-01-01
Supplement: c3ta10789b.pdf [file c3ta10789b.pdf]

## Supporting Information

A seal glass should sinter well in order to avoid the formation of voids and reduce the amount and size of strength flaw populations that limit the mechanical strength and the reliability of the resultant GC. Gehlenite and akermanite belong to melilite group of silicates and form continuous solid solutions. Due to the high content and the mobility of alkaline–earth ions in these glasses, intermediate crystalline phases form upon sintering, thus hindering the complete densification in the resultant GCs. In our previous study we attempt control the mobility of CaO and avoid the formation of meta–stable crystalline phases by adding to the glass composition different amounts of the low melting  $\text{Bi}_2\text{O}_3$ . Enhanced sintering was only observed in the presence of small amount of  $\text{Bi}_2\text{O}_3$ . In the present work, substitution of Sr for Ca and B for Al in melilite composition (MB–1)<sup>1</sup> was attempted and the effect of adding different amounts of  $\text{ZrO}_2$  on glass properties such as structural, thermal and mechanical were investigated. To avoid impair of technological properties of parent glass a large amount of  $\text{ZrO}_2$  (> 5 mol. %) was not used in the present investigation.

### S1: Experimental

High purity powders of  $\text{SiO}_2$  (>99.5%),  $\text{CaCO}_3$  (>99.5%),  $\text{MgCO}_3$  (BDH chemicals, UK, >99%),  $\text{BaCO}_3$  (Sigma Aldrich, 99.9%),  $\text{Al}_2\text{O}_3$  (Sigma Aldrich, >98%),  $\text{La}_2\text{O}_3$ ,  $\text{SrCO}_3$  (Sigma Aldrich, 99.9%),  $\text{H}_3\text{BO}_3$  (>99.5%),  $\text{Bi}_2\text{O}_3$  (Sigma Aldrich, 99.9%), and  $\text{ZrO}_2$  (Sigma Aldrich, 99%) were used. Homogeneous batch mixtures of 100 g (Table 1), obtained by ball milling were preheated at 1100 °C for 5 h for decarbonisation and then melted in Pt crucibles at 1585 °C for 2 h, in air. More experimental details were described elsewhere.<sup>1–3</sup> The amorphous nature of glasses was confirmed by X–ray diffraction (XRD) analysis (Rigaku Geigerflex D/Max, Tokyo, Japan; C Series; Cu  $K_\alpha$  radiation;  $2\theta$  range 10°–80°; step 0.02 °s<sup>–1</sup>).

The sintering behavior of the glass powders was investigated using a side-view hot stage microscope (HSM) EM 201 equipped with image analysis system and 1750/15 Leica electrical furnace. The values of the crystallization onset temperature ( $T_c$ ) and peak temperature of crystallization ( $T_p$ ) were obtained from the DTA thermographs using differential thermal analysis (DTA-TG, Setaram Labsys, Setaram Instrumentation, Caluire, France) at a heating rate of 5 K min<sup>-1</sup>. The detailed experimental procedures were previously described.<sup>1-3</sup> The mechanical properties were evaluated by measuring the three-point bending strength of rectified parallelepiped bars of sintered GCs (Shimadzu Autograph AG 25 TA, Columbia, MD; 0.5 mm min<sup>-1</sup> displacement). The values of CTE for GCs were obtained from dilatometry measurements carried out on prismatic samples with a cross section of 4 mm × 5 mm (Bahr Thermo Analyze DIL801 L, Hullhorst, Germany; heating rate 5 K min<sup>-1</sup>).

Rectangular bars with dimensions of 4 mm × 5 mm × 50 mm were prepared by uniaxial pressing (80 MPa). In order to study the shrinkage behavior and density of resultant GC sealants, glass powder rectangular bars were sintered at 850 °C for 1 h. To study the stability of the above mentioned properties, the GCs sintered at 850 °C for 1 h were further heat treated at 800 °C for 500 h at 5 K min<sup>-1</sup>. The linear shrinkage during sintering was calculated from the difference in the dimensions between the green and the sintered bars. Archimedes' method (i.e., immersion in diethyl phthalate) was employed to measure the apparent density of the sintered GCs. The bending strength of the GCs sintered at 850 °C for 1 h was measured (Shimadzu Autograph AG 25 TA, Columbia, MD; 0.5 mm min<sup>-1</sup> displacement) and the mechanical reliability was tested by applying the well-known Weibull statistics to the experimental data.<sup>4</sup>

Infrared spectrum of glass was obtained using an Infrared Fourier spectrometer (FT-IR, model Mattson Galaxy S7000, USA). For this purpose, the glass powder was mixed with KBr in

the proportion of 1/150 (by weight) and pressed into a pellet using a hand press. 64 scans for background and 64 scans per sample were made with signal gain 1. The resolution was  $4\text{ cm}^{-1}$ .

## S2: Physical and thermal properties of glasses

**Table S1:** Density ( $\text{g cm}^{-3}$ ), molar volume (MV) ( $\text{cm}^3\text{ mol}^{-1}$ ), Excess molar volume (EMV) ( $\text{cm}^3\text{ mol}^{-1}$ ), and CTE ( $\times 10^{-6}\text{ K}^{-1}$ ) (200–700 °C) of glasses

|      | Density     | MV         | EMV       | CTE  | T <sub>ds</sub> |
|------|-------------|------------|-----------|------|-----------------|
| Zr-0 | 3.240±0.004 | 20.88±0.03 | 0.81±0.02 | 11.0 | 752             |
| Zr-1 | 3.265±0.002 | 20.68±0.01 | 0.63±0.01 | 10.7 | 755             |
| Zr-2 | 3.284±0.003 | 20.51±0.02 | 0.49±0.02 | 10.7 | 763             |
| Zr-3 | 3.320±0.001 | 20.25±0.01 | 0.25±0.01 | 10.5 | 773             |
| Zr-4 | 3.342±0.003 | 20.07±0.02 | 0.11±0.02 | 10.6 | 781             |

All the five glass compositions were prone for easy casting after 2 h of melting at 1585 °C, resulting in homogeneous and transparent glasses. Among the various physical properties of the glass, density is the most important and sensible to the glass composition. The variation of the density and molar volume by the  $\text{ZrO}_2$  addition, reported in Table S1, shows a clear increase in the experimental density as a function of the  $\text{ZrO}_2$  concentration in the glass matrix. The increasing density values of the glass matrix induced by the incremental amounts of added zirconia reflect the trend expected from the incorporation of a denser oxide. In general, the addition of extra ions in the glass structure results in the modification of the density of the final material. In particular, this effect is strongly related to the mass of the added ions as a function of their content in the base glass. The enhancement in glass density with added amount of  $\text{ZrO}_2$  correlates well with the observed decreasing trend for the molar volume (Table S1). The closer packing of the glass structure explains the network forming role of  $\text{ZrO}_2$  in the present glass matrix.

The values of softening point temperature ( $T_s$ ) increased monotonically from 752 to 781 °C while CTE of the glasses non-significantly decreased with increasing  $ZrO_2$ . Thus, the maximum value was revealed for Zr-0 glass ( $11 \times 10^{-6} K^{-1}$ ) and the minimum for Zr-4 ( $10.6 \times 10^{-6} K^{-1}$ ). Further, the increasing  $T_s$  and the decreasing CTE values also support the network former role played by the Zr atoms in the glass materials, in good agreement with the local structure information gathered from NMR measurements.<sup>5</sup> However, as explained by Lancellotti et al.,<sup>6</sup> the added  $ZrO_2$  does not considerably affect the glass structure, since the addition of species that fill the interstices of the vitreous network will generally increase the density and the corresponding properties of the material.

### S3: XRD-Rietveld RIR

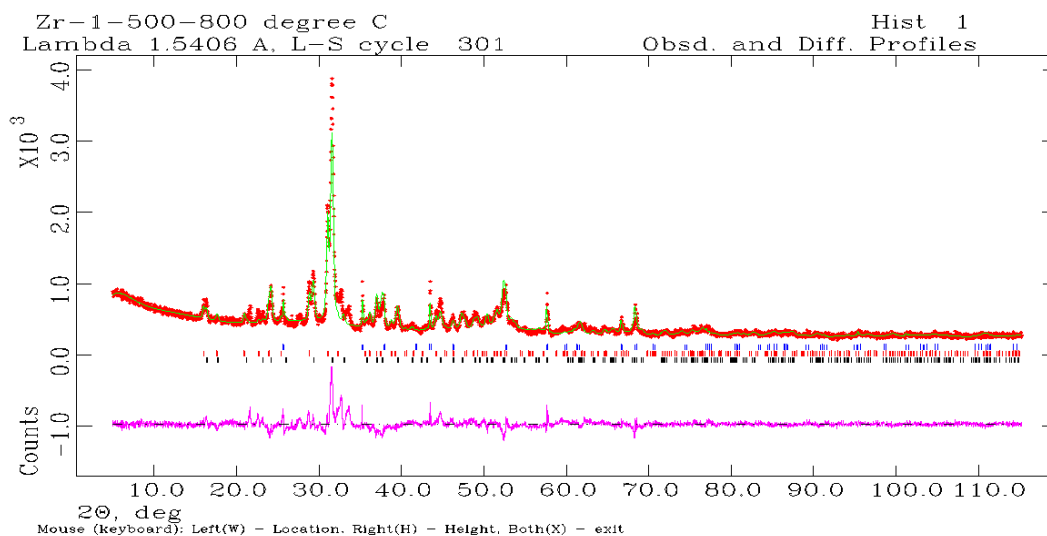

**Figure S1:** Observed, calculated, and difference curve from the Rietveld refinement of the Zr-1 GC heat treated at 800 °C for 500 h in air atmosphere.

Fig. S1 shows the fit of a measured XRD pattern of a sintered GC by using the GSAS-EXPGUI software. The difference plot does not show any significant misfits. The differences under the main peaks of akermanite and gehlenite are caused by adjustment difficulties based on crystallinity of phases.

## S4: Structural information: Solid state NMR and FTIR

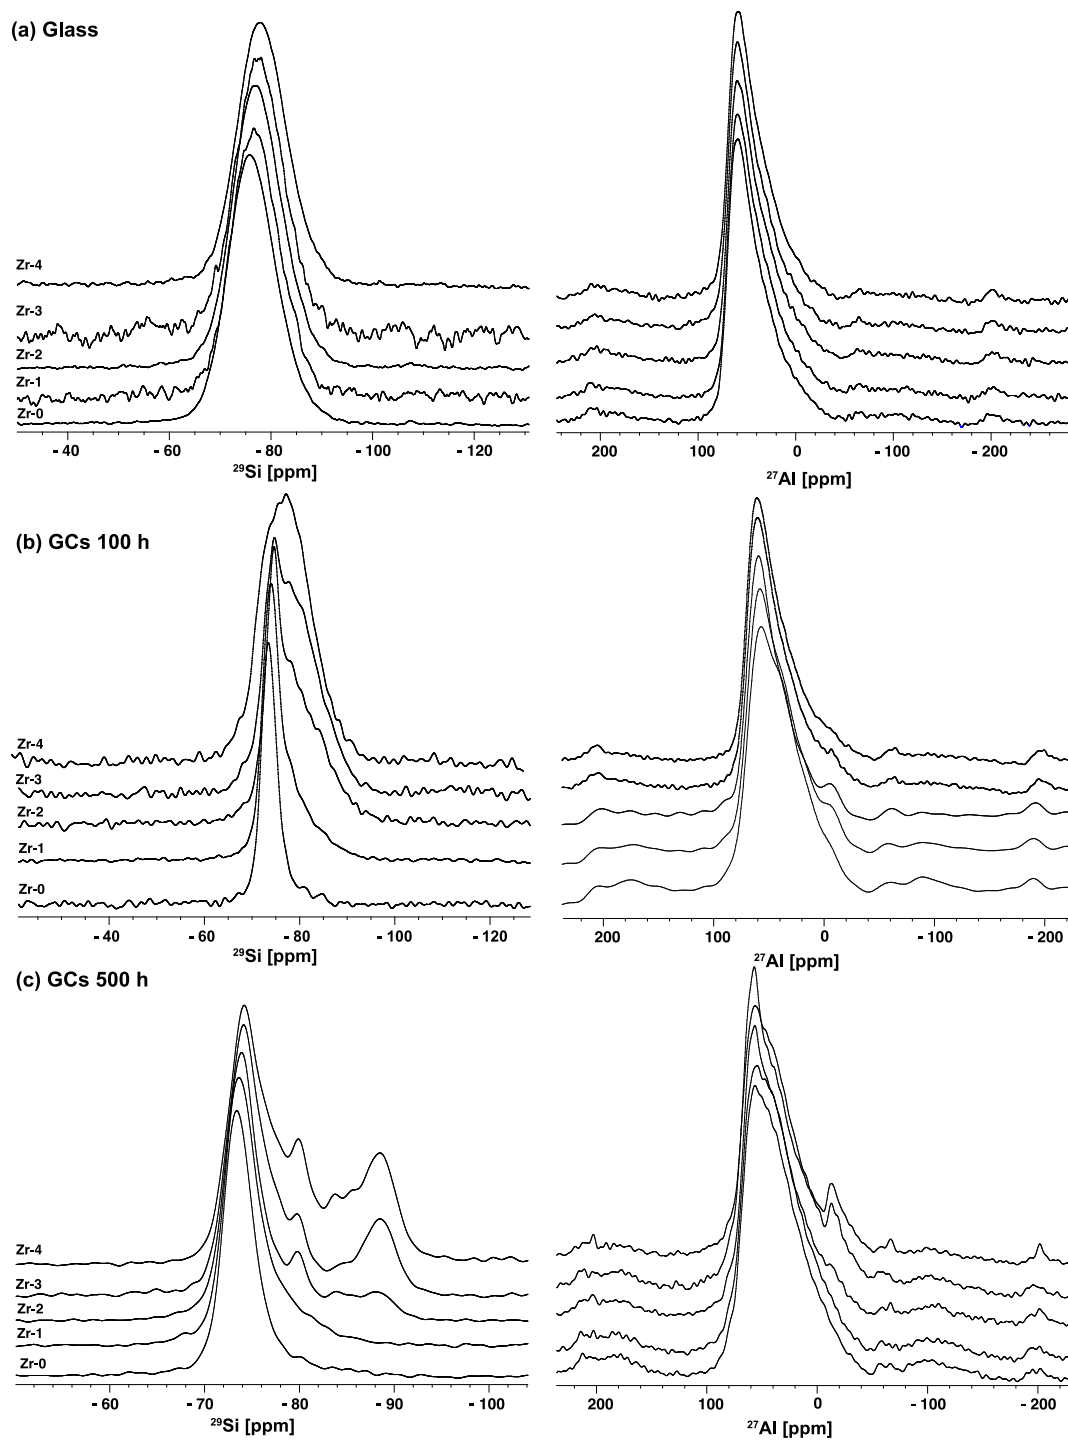

**Figure S2.** (left)  $^{29}\text{Si}$  MAS and (right)  $^{27}\text{Al}$  MAS NMR spectra of the Zr-0 to Zr-4 glasses and Zr-0 to Zr-4 GCs sintered at 850 °C for 100 and 500 h.

**Table S2:** Quantification of the deconvoluted silicon components from Figure 3.

| Resonance<br>(ppm) | Peak | Area /a.u.   | Percentage<br>Area (%) | FWHM<br>(a.u.) |
|--------------------|------|--------------|------------------------|----------------|
| <b>Zr0</b>         |      |              |                        |                |
| -73.5              | a    | n/a          | 100                    | 4.52           |
| <b>Zr-2</b>        |      |              |                        |                |
| -73.8              | a    | 5.00 ± 0.004 | 74.2                   | 4.65           |
| -77.0              | b    | 0.28 ± 0.013 | 4.2                    | 2.73           |
| -79.8              | c    | 0.69 ± 0.010 | 10.2                   | 3.64           |
| -83.8              | d    | 0.26 ± 0.011 | 3.9                    | 2.35           |
| -85.5              | e    | 0.05 ± 0.007 | 0.7                    | 2.63           |
| -88.2              | f    | 0.46 ± 0.004 | 6.8                    | 5.09           |
| <b>Zr-4</b>        |      |              |                        |                |
| -74.0              | a    | 4.88 ± 0.002 | 49.8                   | 4.67           |
| -77.0              | b    | 0.84 ± 0.003 | 8.6                    | 3.45           |
| -79.9              | c    | 1.37 ± 0.004 | 14.0                   | 3.89           |
| -83.8              | d    | 0.64 ± 0.004 | 6.5                    | 3.41           |
| -85.5              | e    | 0.06 ± 0.003 | 0.6                    | 1.31           |
| -88.2              | f    | 2.00 ± 0.004 | 20.4                   | 5.40           |

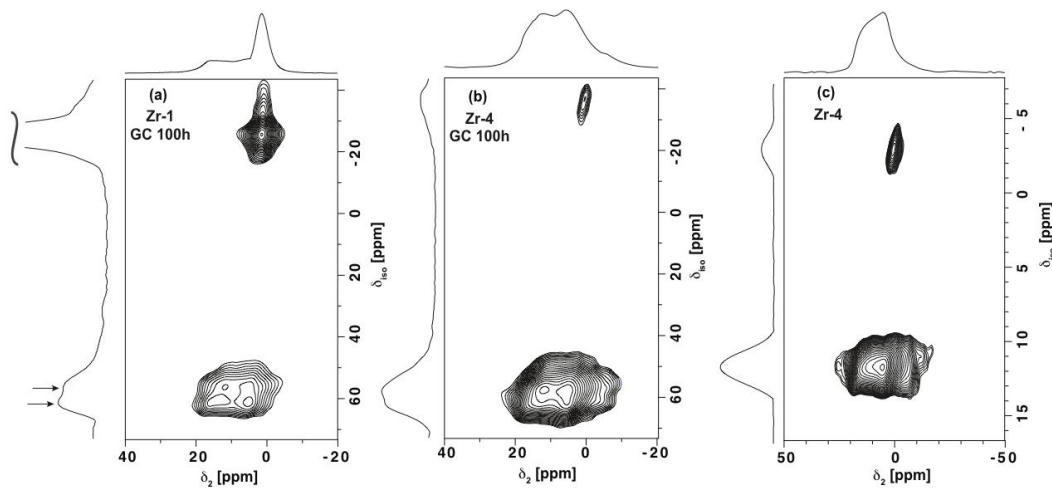

**Figure S3.** 2D <sup>11</sup>B 3QMAS spectra of (a) Zr-1 and (b) Zr-4 GCs samples sintered for 100 h and (c) 2D <sup>11</sup>B STMAS spectrum of the Zr-4 glass sample.

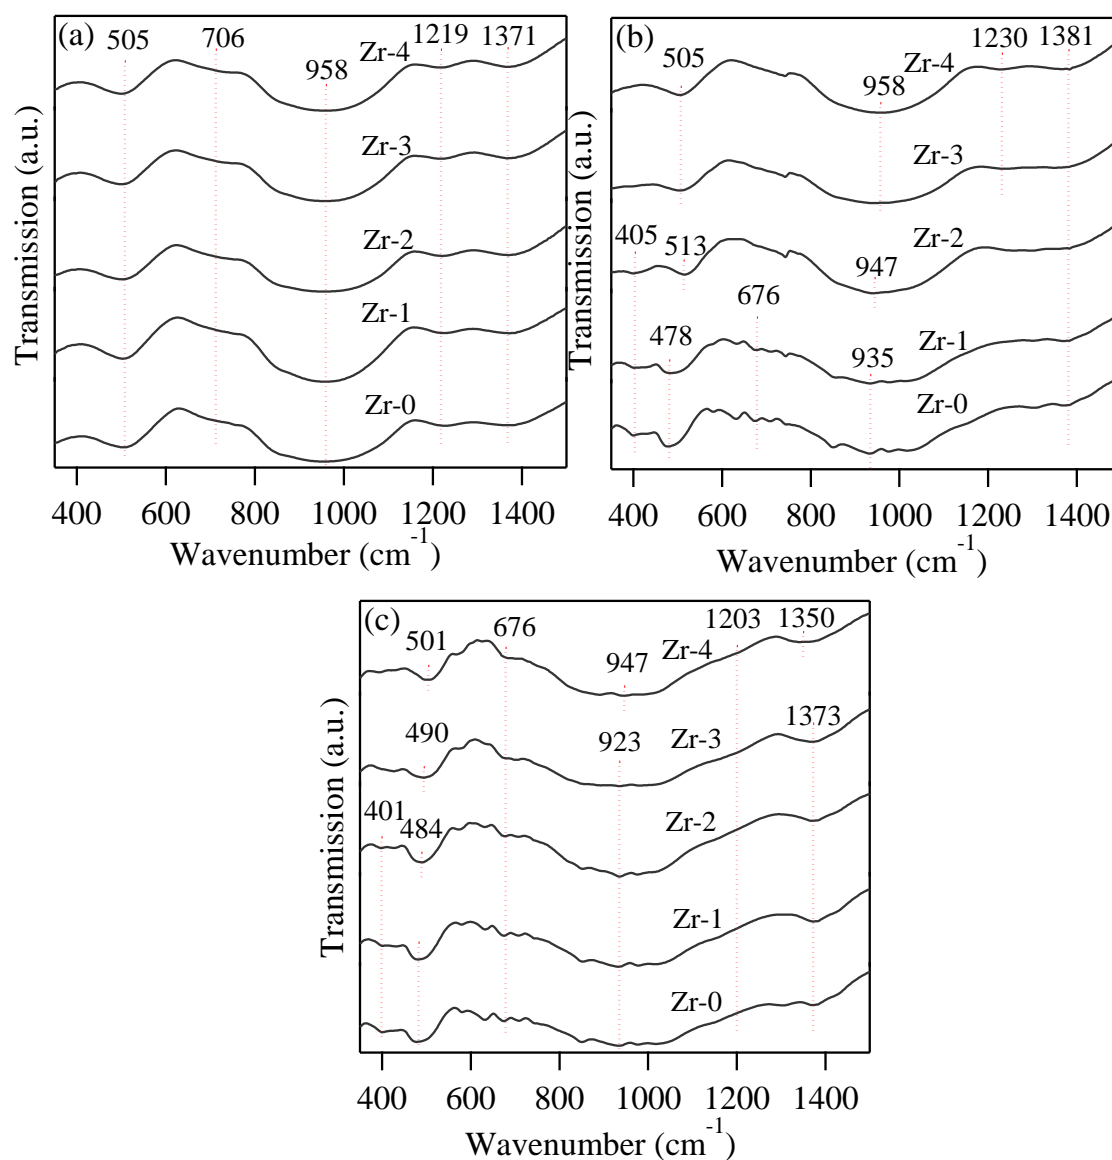

**Figure S4:** FTIR spectra of (a) investigated glasses and glass–ceramics annealed at 800 °C for (b) 100 h and (c) 500 h

The room temperature FTIR transmittance spectra of the investigated glass is shown in Fig. 1. The glass exhibits four broad transmittance bands in the region of 300 to 1500  $\text{cm}^{-1}$ . This lack of sharp feature is an indicative of general disorder in the silicate network mainly due to the wide distribution of  $Q^n$  units (polymerization in the glass structure, where  $n$  denotes the number

of bridging oxygens) occurring in the glasses. The most intense broad band in the 800–1200  $\text{cm}^{-1}$  region indicates the stretching vibrations of Si–O–Si linkages in the  $\text{SiO}_4$  tetrahedron unit. The appearance of high intensity broad band at 958  $\text{cm}^{-1}$  due to the nonbridging Si–O terminal stretching vibrations, suggest that  $\text{Q}^2$  units are highly localised. The band in the 300–600  $\text{cm}^{-1}$  region corresponds to bending vibrations of Si–O–Si and Si–O–Al linkages. With respect to the aluminum coordination in glass structure, the presence of transmittance band from medium to strong intensity in the 600–750  $\text{cm}^{-1}$  region with the centre of gravity at  $\sim 694 \text{ cm}^{-1}$  is a typical feature of stretching vibration of the Al–O bond with aluminum ions in Al four coordination. The absorption band in the 1350–1550  $\text{cm}^{-1}$  region of the spectrum indicates the existence of three-coordinated boron atoms ( $\text{BO}_3$ ) whereas the absorption band in the region 1200 to 1300  $\text{cm}^{-1}$  indicates the existence of isolated ( $\text{BO}_3$ ) $^{3-}$  ions. However, as confirmed from  $^{11}\text{B}$  NMR studies the existence of  $\text{BO}_4$  units, having the characteristic frequency range of 1100–1200  $\text{cm}^{-1}$  is difficult from the FTIR spectra because  $\text{SiO}_4$  groups have similar vibrational frequency and react with them. The FTIR spectra presented in Fig. S4 of all glass powder compacts sintered at 850 °C for 1 h and at 800 °C for 100 h, 500 h show the splitting of broad bands into a number of intense and sharp bands. This indicating the crystalline nature of the samples. Further, these results are in accordance with the XRD and NMR studies. With the prolonged heat treatment the appearance of absorption band in the region of 1200  $\text{cm}^{-1}$  confirming the existence and the reaction of  $\text{BO}_4$  units with the  $\text{SiO}_4$  groups in the present glasses.<sup>7</sup>

### **S5: Glass-ceramic properties: Density, Shrinkage and Weibull statistics**

Table S2 presents linear shrinkage, density and Weibull statics results of GCs after sintering at 850 °C for 1 h and 500 h. Usually, glassy powders in which sintering precedes crystallization result in high shrinkage, dense and mechanically strong GCs.



**Table S2:** Shrinkage (%), density ( $\text{g cm}^{-3}$ ) and Weibull distributions ( $m$  and  $\sigma_0$ ) measured for the glass–powder compacts after sintering at  $850\text{ }^{\circ}\text{C}$  for 1 h followed by at  $800\text{ }^{\circ}\text{C}$  for 500 h.

| Composition                                   | Zr-0      | Zr-1      | Zr-2      | Zr-3      | Zr-4      |
|-----------------------------------------------|-----------|-----------|-----------|-----------|-----------|
| <b>Shrinkage (%)</b>                          |           |           |           |           |           |
| 1 h                                           | 13.7±0.5  | 13.3±0.6  | 13.3±0.4  | 13.1±0.5  | 12.7±0.5  |
| 500 h                                         | 14.3±0.3  | 13.8±0.5  | 14.8±0.4  | 14.3±0.3  | 13.0±0.5  |
| <b>Density (<math>\text{gcm}^{-3}</math>)</b> |           |           |           |           |           |
| 1 h                                           | 3.22±0.01 | 3.25±0.01 | 3.30±0.01 | 3.31±0.01 | 3.34±0.01 |
| 500 h                                         | 3.22±0.01 | 3.34±0.01 | 3.31±0.01 | 3.35±0.01 | 3.35±0.01 |
| <b>Weibull modulus</b>                        |           |           |           |           |           |
| 1 h                                           | 6.5       | 7.2       | 10.75     | 7.4       | 10        |
| 500 h                                         | 6.7       | 10.6      | 7.57      | 9.7       | 7.3       |
| <b>Weibull strength (MPa)</b>                 |           |           |           |           |           |
| 1 h                                           | 118       | 113       | 108       | 111       | 102       |
| 500 h                                         | 124       | 120       | 106       | 112       | 102       |

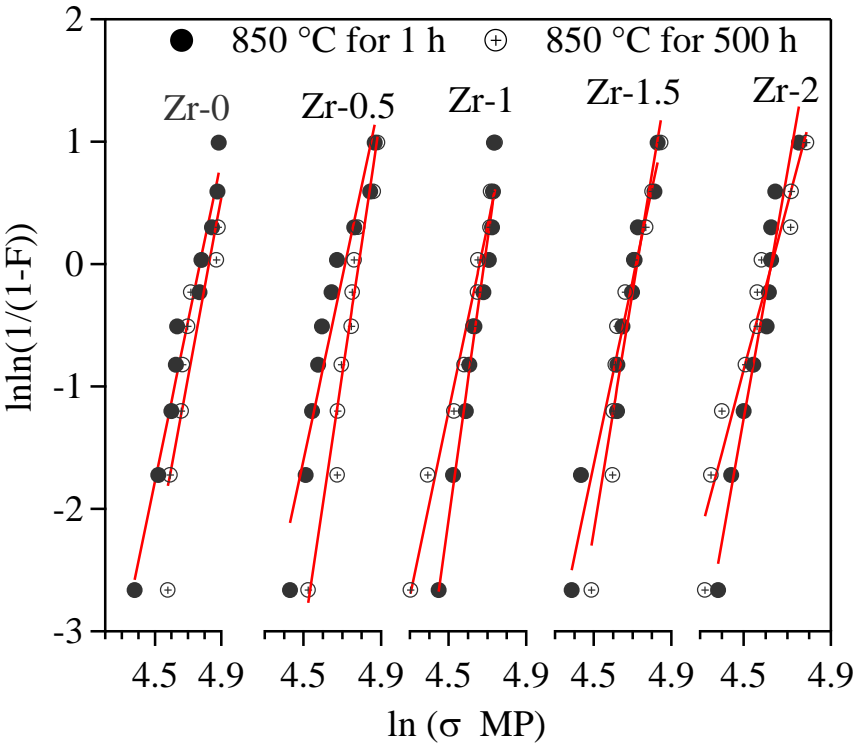

**Figure S5:** Weibull distribution of flexural strength for glass–powder compacts annealed at  $850\text{ }^{\circ}\text{C}$  for 1 h (filled symbols) and heat treated at  $800\text{ }^{\circ}\text{C}$  for 500 h (open symbol).

In the present scenario, the shrinkage values varied between 13% and ~14%, confirming the good densification of glass powder compacts. The density values of GCs are well correlated with the density of the respective bulk glasses and increased with increasing ZrO<sub>2</sub> contents. It can be said that an insufficient amount of the residual glass phase, owing to the effective crystallization, might contribute for the remaining porosity left in the structure, because of the density difference between the glassy and crystalline phases.<sup>8</sup> The addition of ZrO<sub>2</sub> enhanced considerably both the glass shrinkage behavior and the densification degree. In order to characterize mechanical reliability of ZrO<sub>2</sub>-containing melilite seals, the two-parameter Weibull strength distribution for the GCs sintered at 850 °C for 1 h and 500 h are presented in Fig. S5. According to Weibull statistics, the increasing probability of failure ( $F$ ) for a brittle material can be expressed by  $F=1-\exp(-\sigma/\sigma_0)^m$ , where  $F$  is the failure probability for an applied stress ( $\sigma$ ),  $\sigma_0$  is a normalizing parameter known as Weibull characteristic strength, and  $m$  is the Weibull modulus. Here, the Weibull modulus  $m$  is a measure of the degree of strength data dispersion<sup>9</sup>. The bending strength values have been obtained from at least 10 different samples. It can be observed that the failure probability function provides a reasonable fit to the experimental data. A large Weibull modulus, called the shape factor  $m$ , relates to the uniformity of the distribution of flaws in a brittle material: a high value of  $m$  implies a highly uniform distribution of defect sizes and therefore a low level of variability of seal strengths. Conversely, a low value of  $m$  implies highly variable flaw sizes and a large spread of measured strengths. The relatively high Weibull modulus ( $m \sim 7-11$ ) means good mechanical reliability for the sealants. The typical fracture surface of a bending strength tested specimen after heat treating for 500 h at 800 °C were presented in Fig. S6. According to Griffith crack theory, when a propagating crack in the compound encounters a crystal with high strength and elastic modulus, the crack direction is

deviated by the crystal leading to an increase of the cleavage of the surface. As a result, a higher fracture surface energy is required for crack propagation. As observed from Fig. S6, the typical fracture surface of a bending strength tested specimen exhibits rough surfaces and thus may be having low crack growth energy.

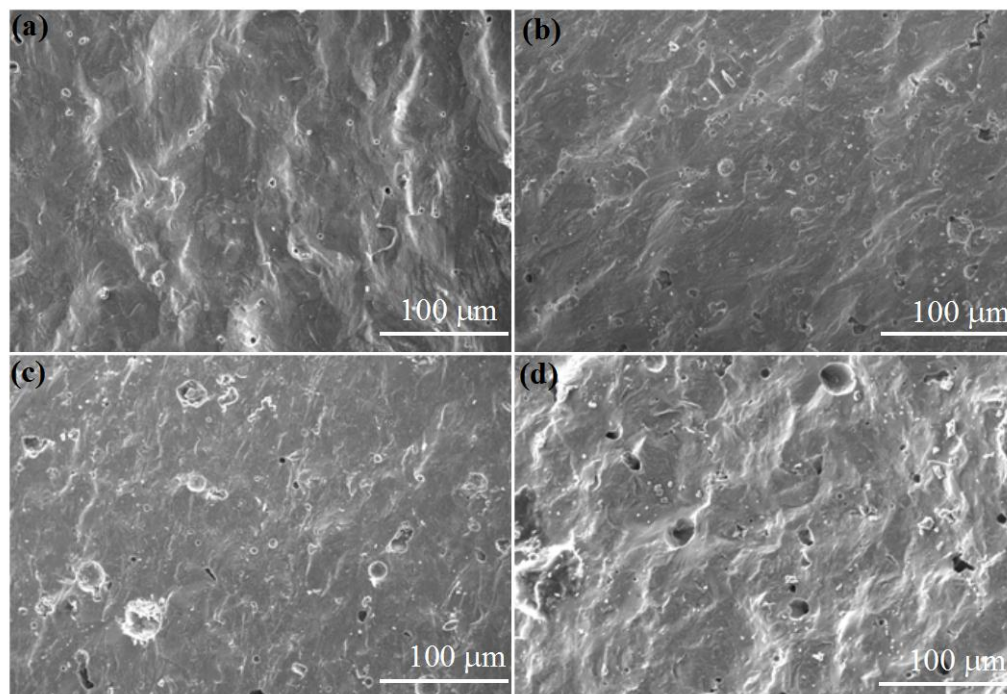

**Figure S6:** Fractured surfaces (a) Zr-1, (b) Zr-2, (c) Zr-3 and (d) Zr-4 GCs sintered at 850 °C for 500 h after the 3 point bending strength measurement.

### S6: Interaction studies

All the GC seals bonded well to Sanergy HT and Crofer22APU metallic interconnects with no gaps being observed, and the investigated interfaces showed homogeneous microstructures over their entire cross-sections of the joint. Fig. S7, shows the SEM image of the interfaces between Sanergy HT/Zr-4 GC along with the corresponding EDS elemental mappings of the relevant elements (Cr, Fe, Mn, Ca and Si) existing at the interface after heat treatment at

850 °C for 1 h in air. Neither diffusion layers were detected at the interfaces by SEM/EDS analyses within the limits of experimental uncertainty.

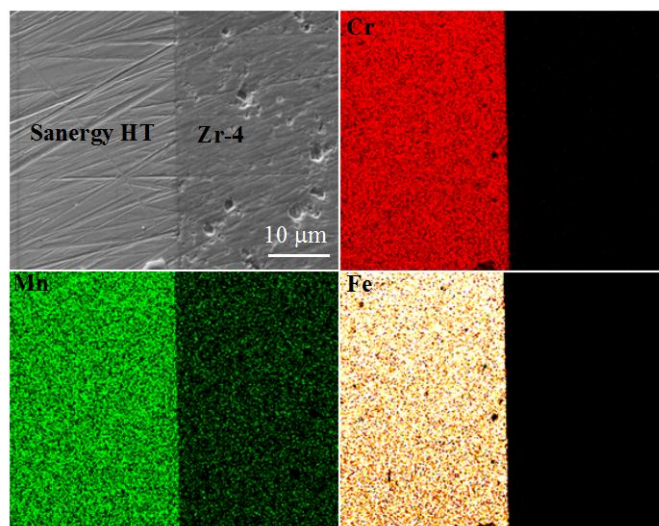

**Figure S7:** SEM image and EDS element mappings for Cr, Mn, and Fe, at the interface between Zr-4 and Sanergy HT after heat treatment at 850 °C for 1 h

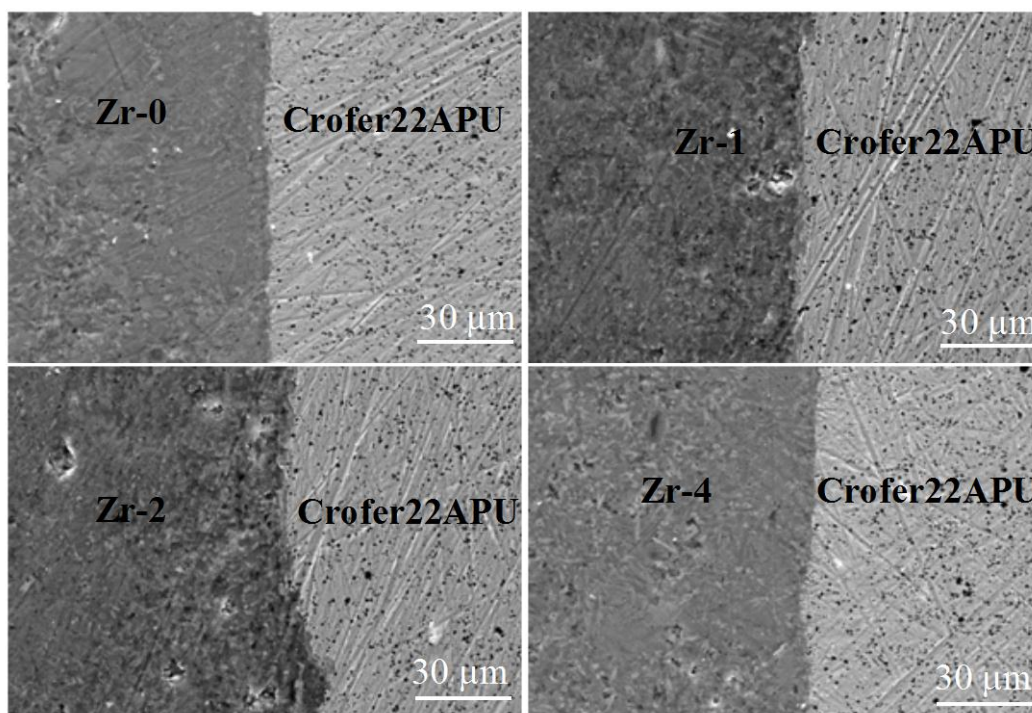

**Figure S8:** SEM images at the interface of (a) Zr-0 / Crofer22APU; (b) Zr-1 / Crofer22APU; (c) Zr-2 / Crofer22APU and (d) Zr-4 / Crofer22APU after heat treatment at 800 °C for 500 h

## References:

1. A. A. Reddy, D. U. Tulyaganov, S. Kapoor, A. Goel, M. J. Pascual, V. V. Kharton and J. M. F. Ferreira, *RSC Advances*, 2012, **2**, 10955.
2. A. A. Reddy, D. U. Tulyaganov, A. Goel, S. Kapoor, M. J. Pascual and J. M. F. Ferreira, *J. Mater. Sci.* 2013.
3. A. A. Reddy, D. U. Tulyaganov, M. J. Pascual, V. V. Kharton, E. V. Tsipis, V. A. Kolotygin and J. M. F. Ferreira, *Int.J. Hydrogen Energy*, 2013, **38**, 3073-3086.
4. D.W. Richerson, Marcel Dekker, Inc., New York, USA, 1992.
5. B. Luisa, C. Valeria, L. Cristina, M. Monia, M. Piercarlo and S. Cristina, *J. Phy. Chem. B*, 2003, **107**.
6. I. Lancellotti, C. Leonelli, M. Montorsi, G. C. Pellacani, C. Siligardi and C. Meneghini, *Phys. Chem. Glasses* 2002, **43C**, 1.
7. N. M. Bobkova, Zh. S. Tizhovka, V. V. Tizhovka, N. G. Cherenda, *J. Appl. Spectrosc.* 1979, **31**, 1556
8. M. Ghaffari, P. Alizadeh and M. R. Rahimpour, *J. Non-Cryst. Solids*, 2012, **358**, 3304-3311.
9. Allu Amarnath Reddy, Ashutosh Goel, Dilshat U. Tulyaganov, Saurabh Kapoor, K. Pradeesh, Maria J. Pascual and J. M. F. Ferreira, *J. Power Sources* 2013, **231**, 203-212.
